# Supplementary material for: Global Metabolomics Discovers Two Novel Biomarkers in Pyridoxine-Dependent Epilepsy Caused by ALDH7A1 Deficiency
Source: MDPI journal article supplement (doi:10.3390/ijms232416061), 2022-12-16
Supplement: s1 [file s1]

## Supplementary Figures and Table

**Figure S1.** Representative chromatogram of  $[\text{HACA}+\text{H}]^+$  from a sample from a confirmed PDE-ALDH7A1-patient not spiked (S1A), spiked with 1  $\mu\text{M}$  (S1b) and spiked with 100  $\mu\text{M}$  HACA (S1c). The retention time of HACA is 2.442 min. Automatic area (AA) refers to the automatically integrated area under the curve.

**Figure S2.** Fragmentation tree [1] obtained from SIRIUS 5 software describing the fragmentation pattern of the  $\text{C}_9\text{H}_{11}\text{NO}_4$  isomer. The descending presentation of molecular formula in boxes reflects fragments lost as neutral molecules. The relative intensity from the MSMS spectrum in Figure 5 is given in both color intensity and number.

**Figure S3.** Yielded relative peak area of HACA from a prepared sample which has been stored for 1.5 years at  $-20^\circ\text{C}$ . As from the first analysis, this internal positive control has been kept in the autosampler at  $4^\circ\text{C}$  and the peak area has been normalized to the day 0 run.

**Figure S4.** Left: Representative extracted ion chromatogram of the masses of PIP (top-left) and HACA (bottom-left). PIP is detected after adding HACA into water. Visualization of the possible conversion between HACA and PIP via the  $[\text{HACA}-\text{H}_2\text{O}+\text{H}]^+$ -ion. Right: Peak area value of PIP in dependence of amount HACA injected. Linear regression of the dataset leads to the function  $f(x) = 2\text{E}+06 \cdot x + 590919$ .

**Table S1.** Settings used for all MSMS analyses performed with the Q Exactive Orbitrap.

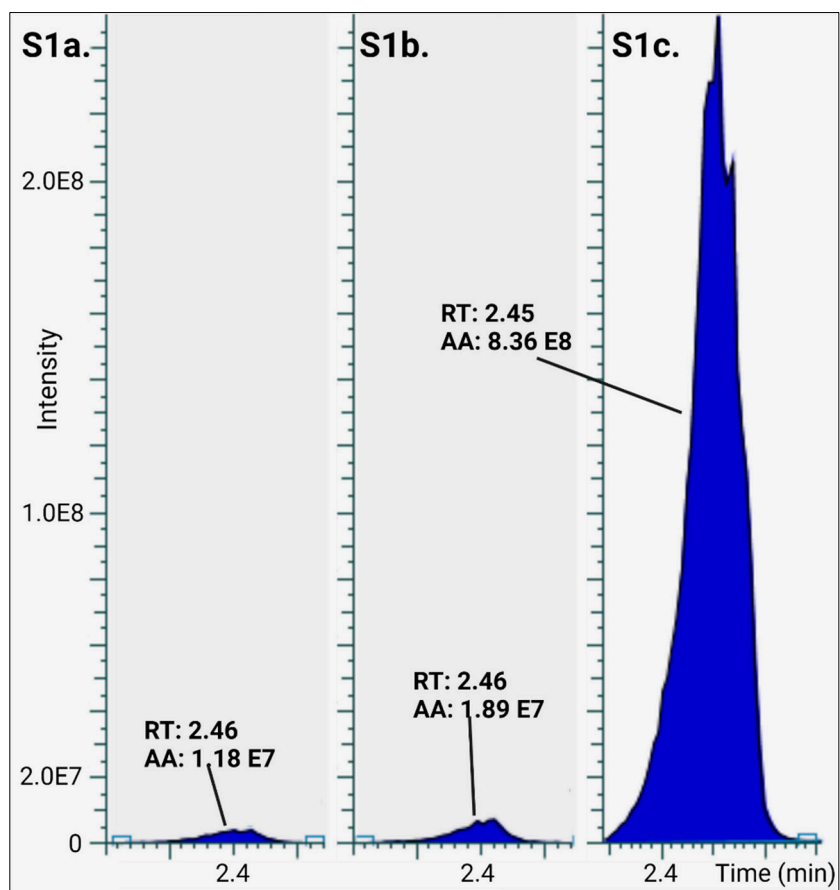

**Figure S1.**

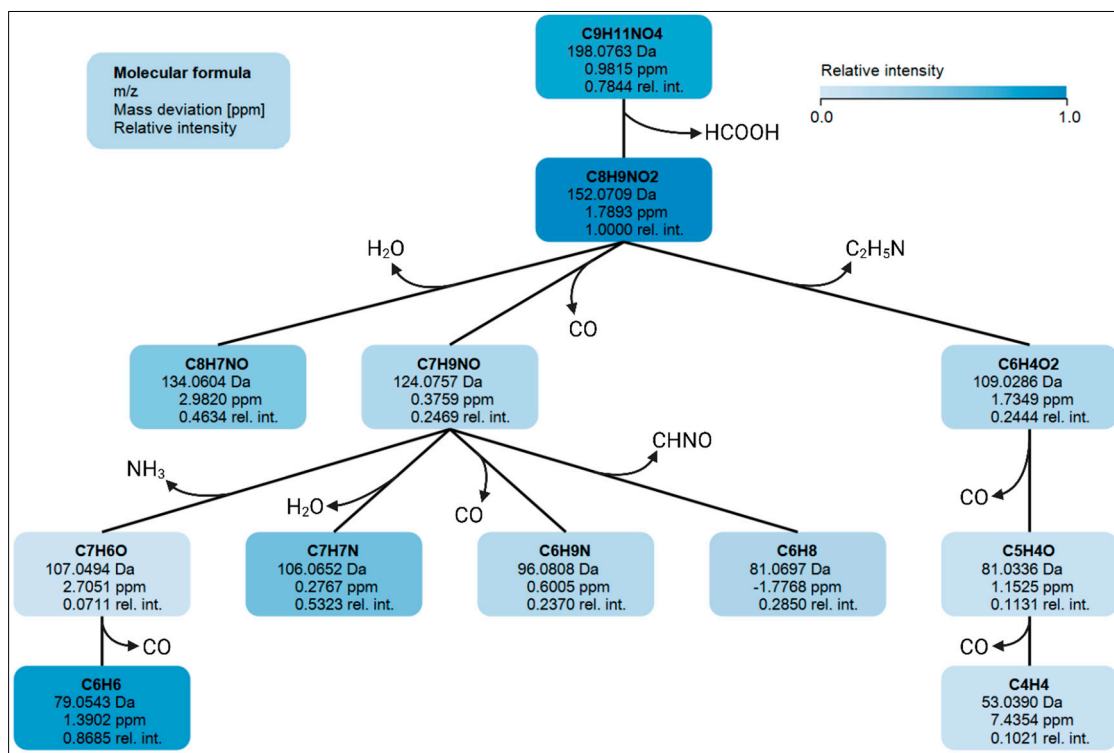

**Figure S2.**

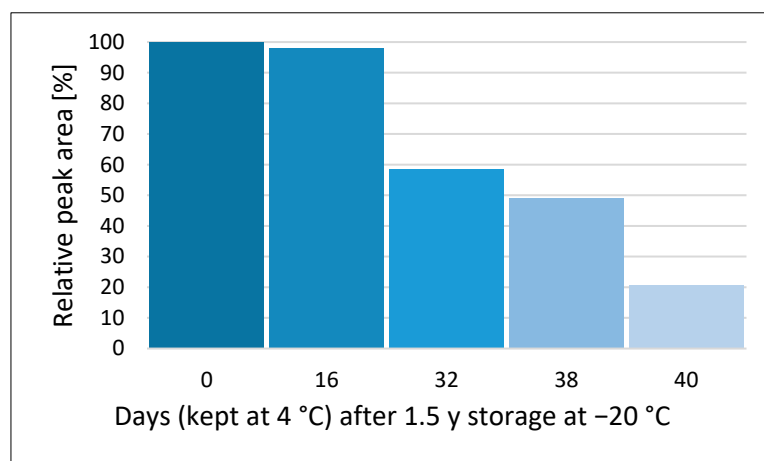

**Figure S3.**

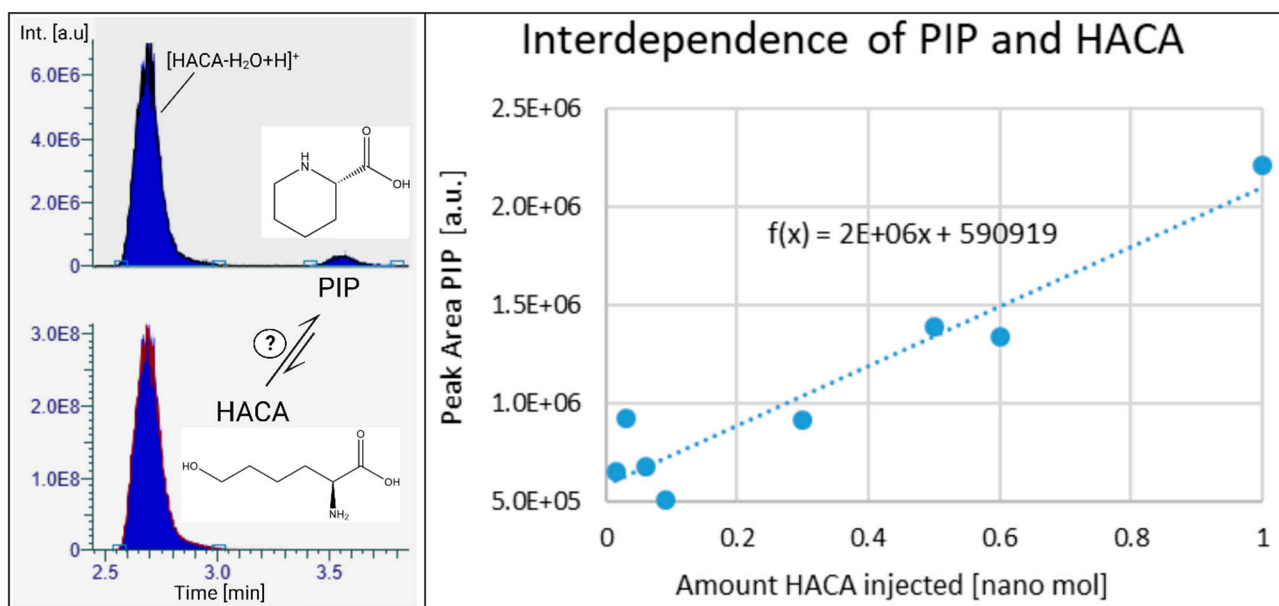

**Figure S4.**

**Table S1.** Settings used for all MSMS analyses performed with the Q Exactive Orbitrap.

|                                     |                                                           |
|-------------------------------------|-----------------------------------------------------------|
| Scan range                          | <i>m/z</i> 50 – 750                                       |
| Resolution                          | Full MS: 70 000<br>MSMS: 17 500                           |
| AGC target value                    | Full MS: 1 000 000 ion counts<br>MSMS: 500 000 ion counts |
| Maximum injection time              | Full MS: 200 ms<br>MSMS: 100 ms                           |
| Polarity                            | Positive                                                  |
| Scan type                           | Data dependent acquisition, top 5                         |
| Dynamic exclusion time              | 10 s                                                      |
| Intensity threshold                 | 50 000 counts per second                                  |
| Stepped normalized collision energy | 20, 50, 80                                                |

## References

1. Böcker, S.; Dührkop, K. Fragmentation trees reloaded. *Journal of cheminformatics* **2016**, 8, 1-26.
